# Supplementary material for: Autentiche finzioni e finte autenticità: gli sconfinamenti tra vita e arte nel teatro di Dario Fo e Franca Rame
Source: MDPI journal article supplement (doi:10.3390/plants12152845), 2011-01-01
Supplement: s1 [file s1]

Supplementary Materials

## Anti-Inflammatory Effect of Ebractenoid F, a Major Active Compound of *Euphorbia ebracteolata* Hayata, through Inhibition of Nuclear Factor- $\kappa$ B Activation

Jaemoo Chun <sup>1,\*</sup>, Sang Yeon Mah <sup>2</sup>, Yeong Shik Kim <sup>2,\*</sup>

<sup>1</sup> KM Convergence Research Division, Korea Institute of Oriental Medicine, Daejeon 34054, Republic of Korea

<sup>2</sup> Natural Products Research Institute, College of Pharmacy, Seoul National University, Seoul 08826, Republic of Korea

\* Correspondence: jchun@kiom.re.kr (J.C.); kims@snu.ac.kr (Y.S.K.); Tel.: +82-42-868-9511 (J.C.); +82-2-880-2479 (Y.S.K.)

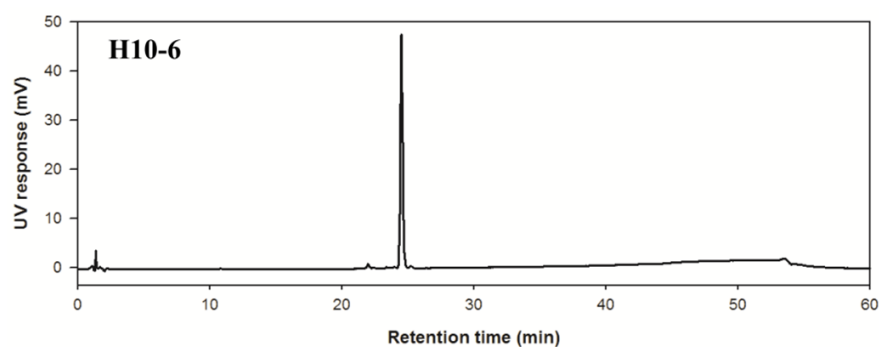

**Figure S1.** HPLC-UV chromatogram of H10-6 fraction.

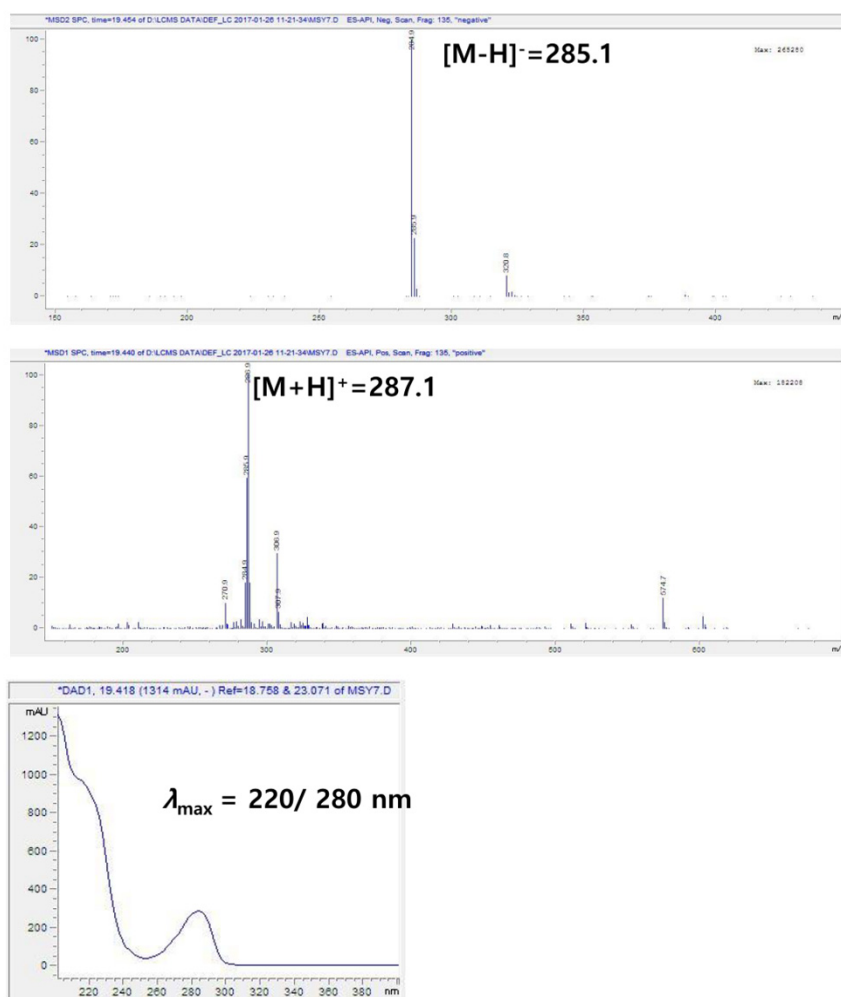

**Figure S2.** LC-ESI/MS spectra and UV spectrum of ebractenoid F. Ebractenoid F generated the protonated ions  $[M+H]^+$  at  $m/z$  287.1 in positive ion mode and the deprotonated ions  $[M-H]^-$  at  $m/z$  285.1 in negative ion mode. The compound has maximum UV absorption at 220 and 280 nm.

<sup>1</sup>H / TOTAL

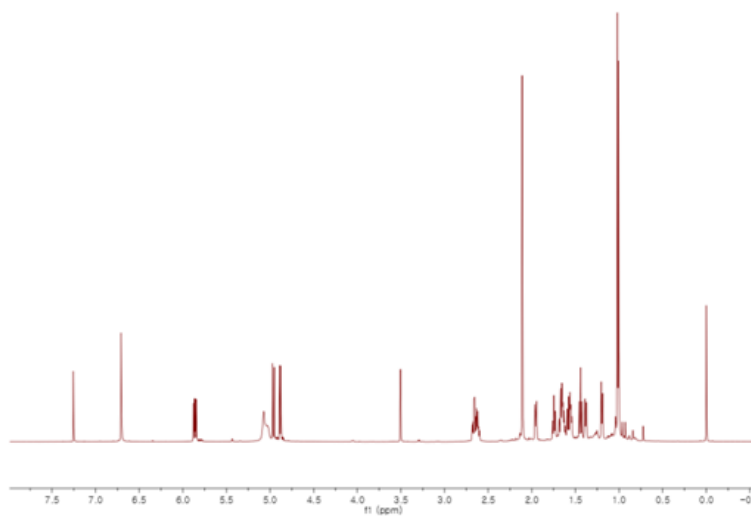

**Figure S3.** <sup>1</sup>H NMR spectra of ebractenoid F (Dissolved in CDCl<sub>3</sub>, 500 MHz).

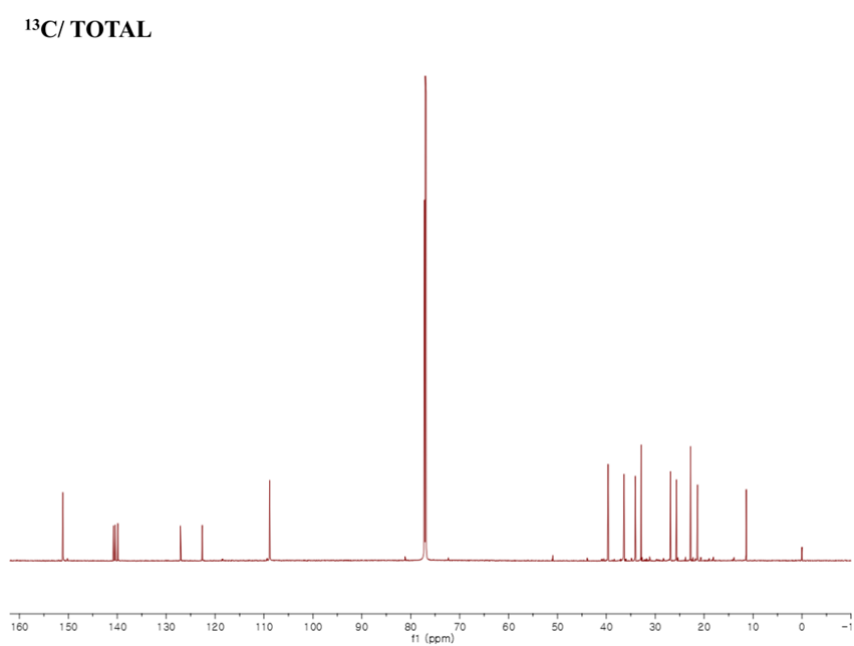

**Figure S4.** <sup>13</sup>C NMR spectra of ebractenoid F (Dissolved in CDCl<sub>3</sub>, 125 MHz).

## A/ ROESY

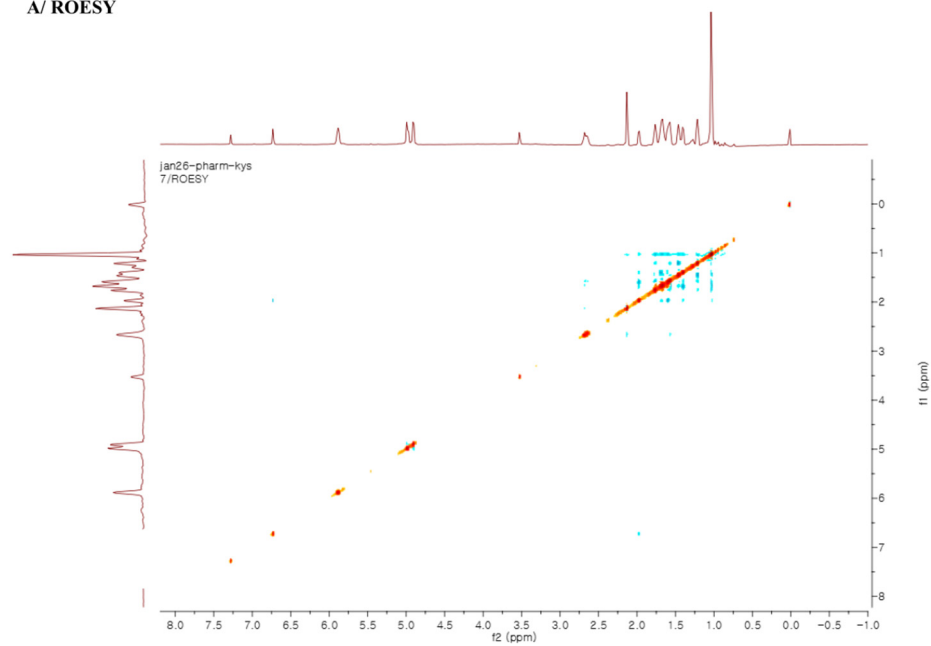

**Figure S5.** ROESY spectrum of ebractenoid F (Dissolved in CDCl<sub>3</sub>, 500 MHz).

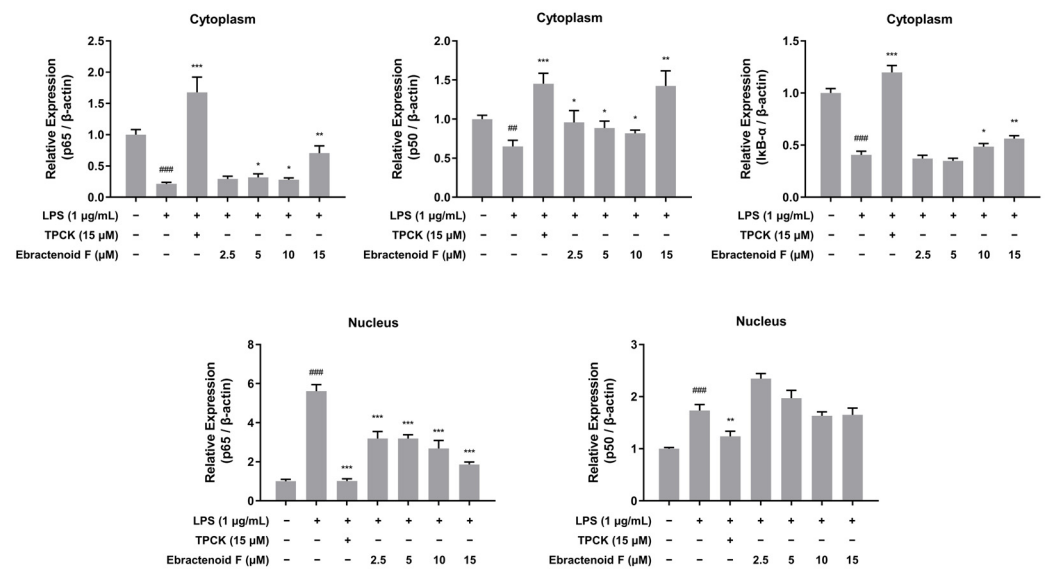

**Figure S6.** The quantification results of p65, p50, and I $\kappa$ B- $\alpha$  proteins in the cytoplasmic and nuclear extracts obtained from LPS-stimulated RAW 264.7 macrophages. The results were quantified using the ImageJ software.
